# Supplementary material
Source: PubMed Central journal article supplement (PMC8603246)
Supplement: jamaotolaryngolheadnecksurg-e213228-s001.pdf [file jamaotolaryngolheadnecksurg-e213228-s001.pdf]

## Supplementary Online Content

Zhu G, Amin N, Herberg ME, et al. Association of tumor site with the prognosis and immunogenomic landscape of human papillomavirus-related head and neck and cervical cancers. *JAMA Oncol*. Published online November 18, 2021. doi:10.1001/jamaoto.2021.3228

**eTable.** The Characterization of HNSCC and Cervical Cancer Patients in TCGA by HPV Status

**eFigure 1.** p16 Is a Less Reliable Biomarker for HPV Status in OCSCC and LSCC Patients

**eFigure 2.** The Expressions of E6 and E7 Transcripts in OPSCCs and Non-OP HNSCCs by p16 Testing

**eFigure 3.** Overall Survival Differences Between Propensity-Score Matched Patients With HPV-positive and -negative Cancers

**eFigure 4.** A 2-Dimensional Reduced Visualization Based on 2630 Immune-related Transcripts in HNSCC and CESC Patients

**eFigure 5.** Comparative Analysis of Immunogenomic Metrics Between HPV-positive and -negative Patients Within Each Tumor Site—B Cells, CD8+ T Cells, and Cytolytic Activity Score

**eFigure 6.** Comparative Analysis of Immunogenomic Metrics Between HPV-positive and -negative Patients Within Each Tumor Site—Plasma Cells, Naive B Cells, CD8+ T/Treg Cells, BCR Diversity, and TCR Diversity

**eFigure 7.** Comparative Analysis of Immunogenomic Metrics Between HPV-positive and -negative Patients Within Each Tumor Site—M2 Macrophages and CTF

**eFigure 8.** Comparative Analysis of Immunogenomic Metrics Between HPV-positive and -negative Patients Within Each Tumor Site—TMB and CNV

This supplementary material has been provided by the authors to give readers additional information about their work.

**eTable. The Characterization of HNSCC and Cervical Cancer Patients in TCGA by HPV status**

|                         | N            |                   |                    |              |                  |                     |
|-------------------------|--------------|-------------------|--------------------|--------------|------------------|---------------------|
|                         | HPV-negative |                   |                    | HPV-positive |                  |                     |
|                         | OP<br>(N=26) | Non-OP<br>(N=408) | Cervical<br>(N=10) | OP<br>(N=53) | Non-OP<br>(N=27) | Cervical<br>(N=244) |
| <b>Age</b>              |              |                   |                    |              |                  |                     |
| Mean (SD)               | 57.4 (10.2)  | 61.6 (12.2)       | 60.4 (15.2)        | 55.3 (8.73)  | 62.9 (7.92)      | 48.2 (13.9)         |
| Median [Min, Max]       | 57 [38, 79]  | 62 [19, 90]       | 57 [34, 81]        | 56 [35, 77]  | 61 [49, 82]      | 46 [20, 88]         |
| <b>Gender</b>           |              |                   |                    |              |                  |                     |
| Female                  | 6            | 123               | 10                 | 4            | 1                | 244                 |
| <b>Race</b>             |              |                   |                    |              |                  |                     |
| White                   | 22           | 340               | 7                  | 51           | 26               | 163                 |
| Others                  | 4            | 68                | 13                 | 2            | 1                | 81                  |
| <b>Smoking history</b>  |              |                   |                    |              |                  |                     |
| Current smoker          | 14           | 146               | 3                  | 9            | 7                | 53                  |
| Lifelong non-smoker     | 3            | 88                | 5                  | 20           | 6                | 107                 |
| Current reformed        | 9            | 163               | 1                  | 23           | 14               | 55                  |
| Unknown                 | 0            | 11                | 1                  | 1            | 0                | 39                  |
| <b>T</b>                |              |                   |                    |              |                  |                     |
| T0, T1, T2              | 11           | 151               | 6                  | 37           | 8                | 165                 |
| T3, T4                  | 15           | 257               | 1                  | 16           | 19               | 26                  |
| Unknown                 | 0            | 0                 | 3                  | 0            | 0                | 53                  |
| <b>N</b>                |              |                   |                    |              |                  |                     |
| N0, N1                  | 12           | 251               | 4                  | 18           | 14               | 154                 |
| N2, N3                  | 14           | 153               | 0                  | 35           | 13               | 0                   |
| Unknown                 | 0            | 4                 | 6                  | 0            | 0                | 90                  |
| <b>M</b>                |              |                   |                    |              |                  |                     |
| M0                      | 23           | 398               | 3                  | 52           | 25               | 99                  |
| M1                      | 1            | 3                 | 3                  | 0            | 1                | 5                   |
| Unknown                 | 2            | 7                 | 4                  | 1            | 1                | 140                 |
| <b>Clinical stage</b>   |              |                   |                    |              |                  |                     |
| I, II                   | 6            | 92                | 7                  | 8            | 3                | 181                 |
| III, IV                 | 20           | 316               | 3                  | 45           | 24               | 56                  |
| Unknown                 | 0            | 0                 | 0                  | 0            | 0                | 7                   |
| <b>Histologic grade</b> |              |                   |                    |              |                  |                     |
| G1, G2                  | 20           | 310               | 0                  | a            | 15               | NA                  |
| G3, G4                  | 4            | 89                | 0                  | a            | 12               | NA                  |
| Unknown                 | 2            | 9                 | 10                 | a            | 0                | 244                 |
| <b>p16 status</b>       |              |                   |                    |              |                  |                     |
| Positive                | 1            | 5                 | NA                 | 31           | 1                | NA                  |
| Negative                | 7            | 62                | NA                 | 1            | 2                | NA                  |

OP: oropharynx; Non-OP: non-oropharynx; SCC: Squamous cell carcinoma; <sup>a</sup>: Tumor grade or differentiation status reporting not recommended for HPV-positive OPSCCs per College of American Pathologists guidelines.



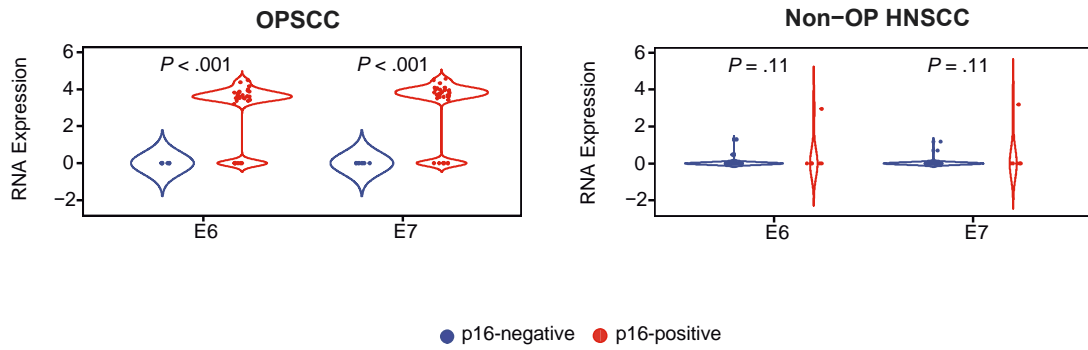

**eFigure 2.** The expressions of E6 and E7 transcripts in OPSCCs and non-OP HNSCCs by p16 testing. RNA expression measured in  $\log_{10}(\text{Read counts} + 1)$ ; OPSCC: oropharyngeal squamous cell carcinoma; non-OP HNSCC: non- oropharyngeal squamous cell carcinoma in the head and neck.

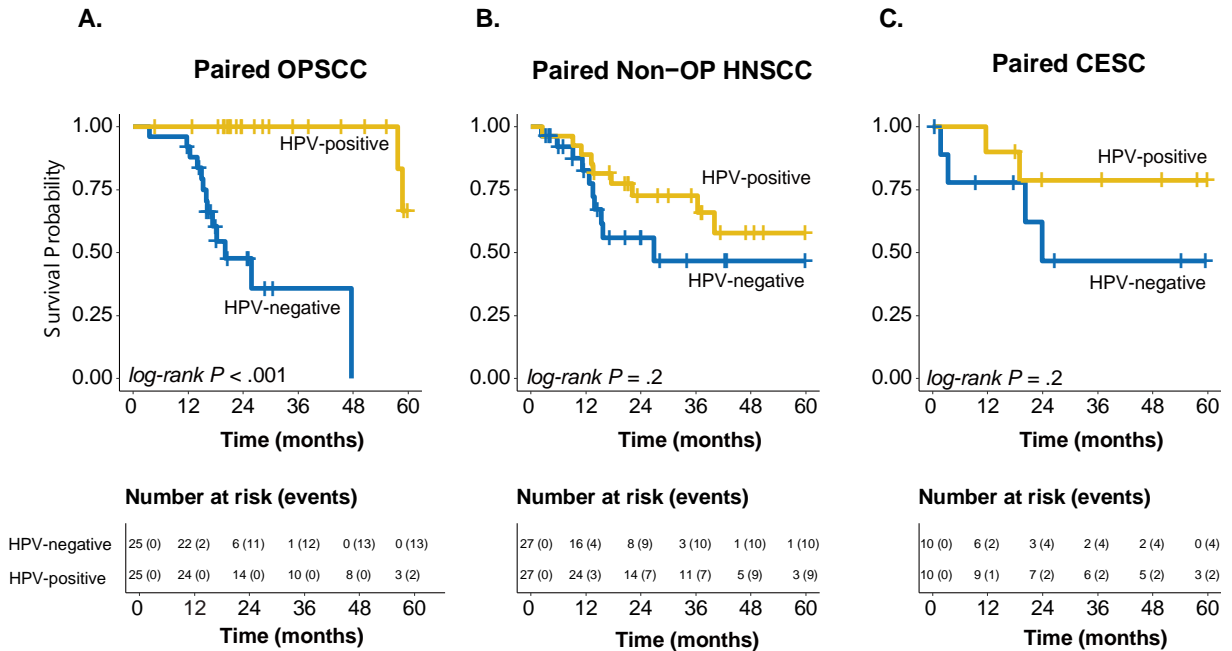

**eFigure 3.** Overall survival differences between propensity-score matched patients with HPV-positive and -negative cancers. Kaplan-Meier survival analysis displaying differences in overall survival between propensity-score matched patients with HPV-positive and -negative cancers arising from the oropharynx, OPSCC (A), non-oropharyngeal head and neck cancer, non-OP HNSCC (B), and cervix, CESC (C). HPV-positivity, age, smoking history, gender, and TNM were matched by propensity-score in these cases.

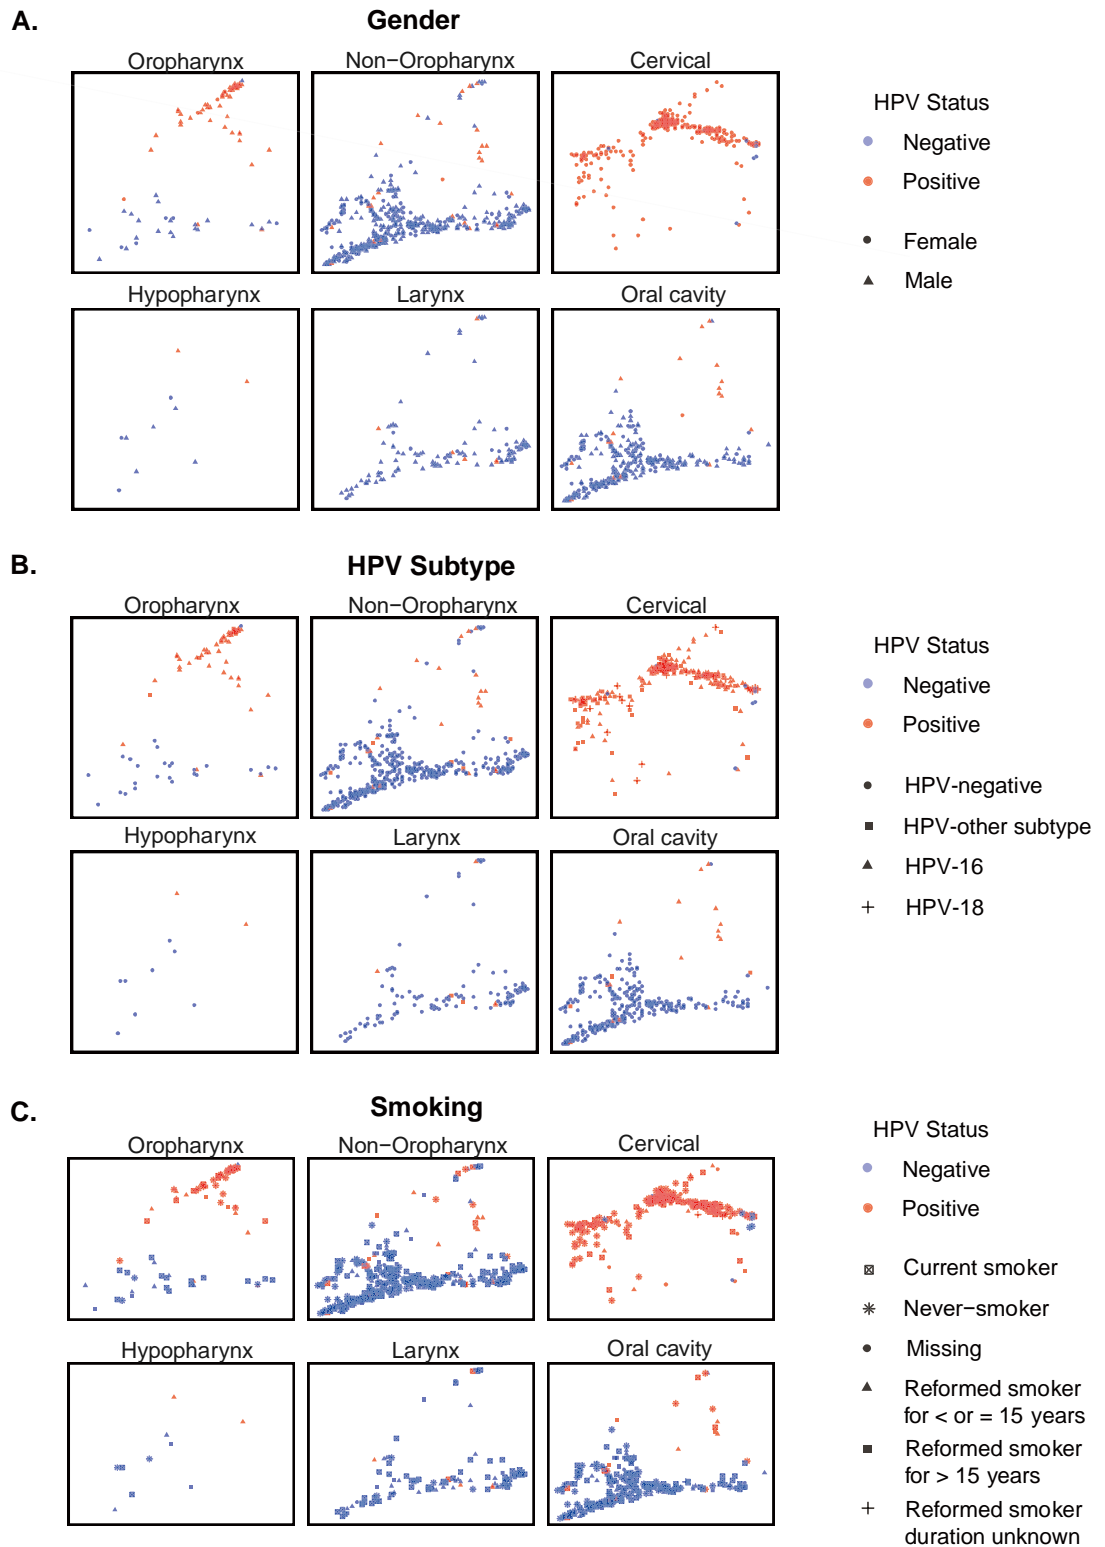

**eFigure 4.** A two-dimensional reduced visualization based on 2,630 immune-related transcripts in HNSCC and CESC patients. The TumorMap discretized by gender (A), HPV subtype (B), smoking history (C) for each site: oropharynx, non-oropharynx, cervix, hypopharynx, and oral cavity. Red = HPV-positive; blue = HPV-negative.

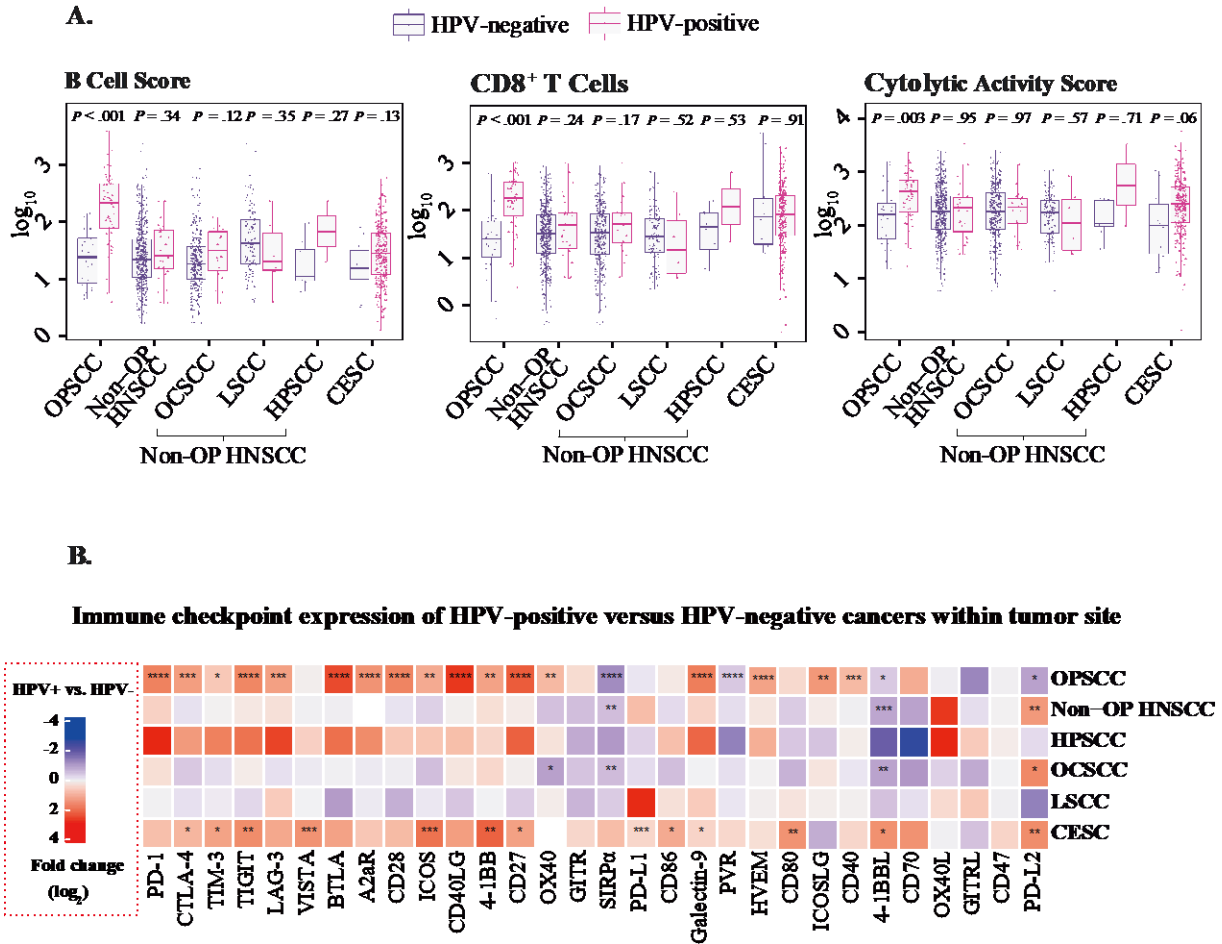

**eFigure 5. Comparative analysis of immunogenomic metrics between HPV-positive and -negative patients within each tumor site.** HPV-positive and -negative non-OP HNSCC and CESC are similar with regards to B cells, CD8<sup>+</sup> T cells, and cytolytic activity scores. Significant differences are seen in the above parameters between HPV-positive and HPV-negative OPSCC (A). The landscape of differentially expressed immunomodulatory checkpoint receptors and ligands between HPV-positive and -negative tumors (B); Color gradient reflects fold change of normalized gene expression in HPV-positive over HPV-negative patients; \*  $P < .05$ , \*\*  $< .01$ , \*\*\*  $< .0001$ , \*\*\*\*  $< .00001$ . OPSCC: oropharyngeal squamous cell carcinoma; non-OP HNSCC: non-oropharyngeal squamous cell carcinoma in the head and neck, which includes the oral cavity, larynx, and hypopharynx; OCSCC: oral cavity squamous cell carcinoma; LSCC: laryngeal squamous cell carcinoma; HPSCC: hypopharyngeal squamous cell carcinoma; CESC: cervical squamous cell carcinoma.



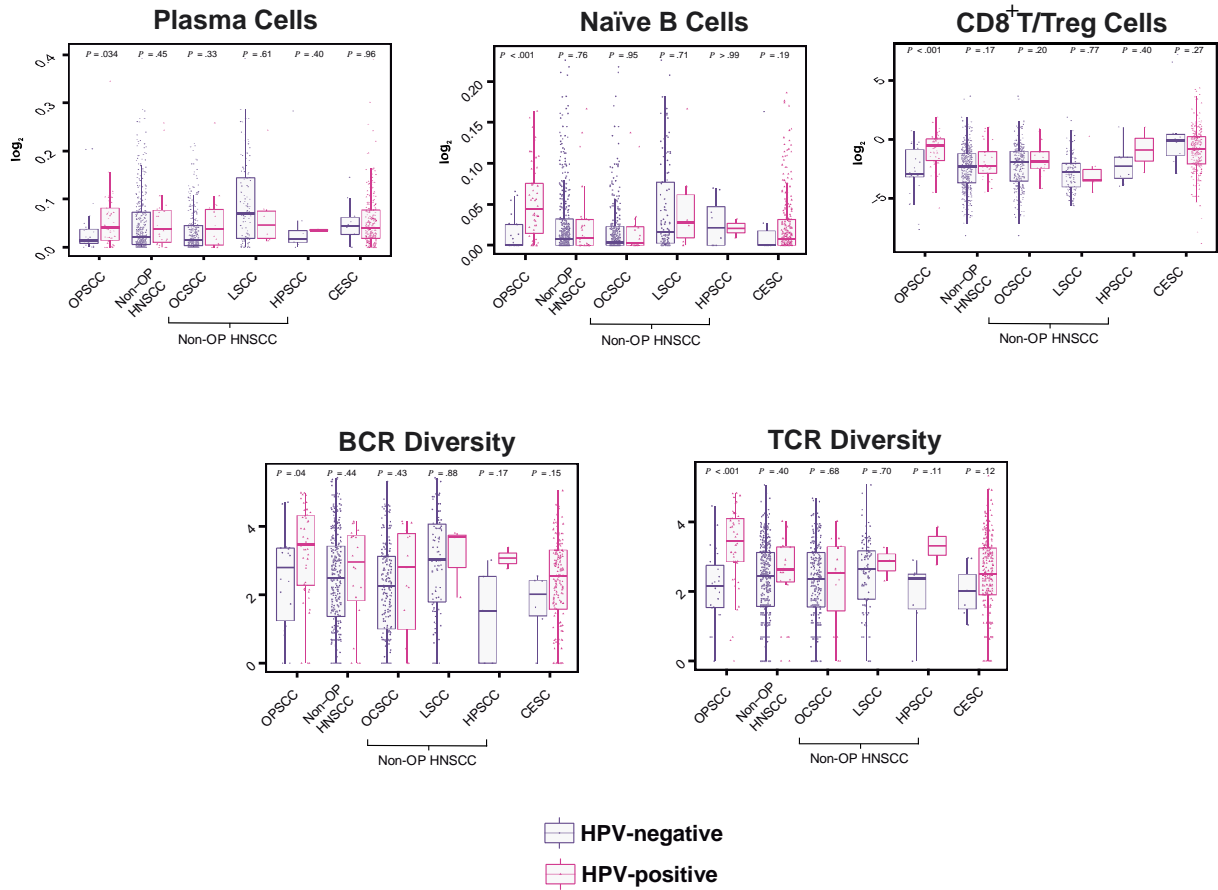

**eFigure 6.** Comparative analysis of immunogenomic metrics between HPV-positive and -negative patients within each tumor site. HPV-positive and -negative non-OP HNSCC and CESC are similar with regard to plasma cells, Naïve B cells, CD8<sup>+</sup> T/Treg cells, TCR diversity, BCR diversity. Significant differences are seen in the above parameters between HPV-positive and HPV-negative OPSCC. OPSCC: oropharyngeal squamous cell carcinoma; non-OP HNSCC: non-oropharyngeal squamous cell carcinoma in the head and neck, which includes the oral cavity, larynx, and hypopharynx; OSCCC: oral cavity squamous cell carcinoma; LSCC: laryngeal squamous cell carcinoma; HPSCC: hypopharyngeal squamous cell carcinoma; CESC: cervical squamous cell carcinoma.

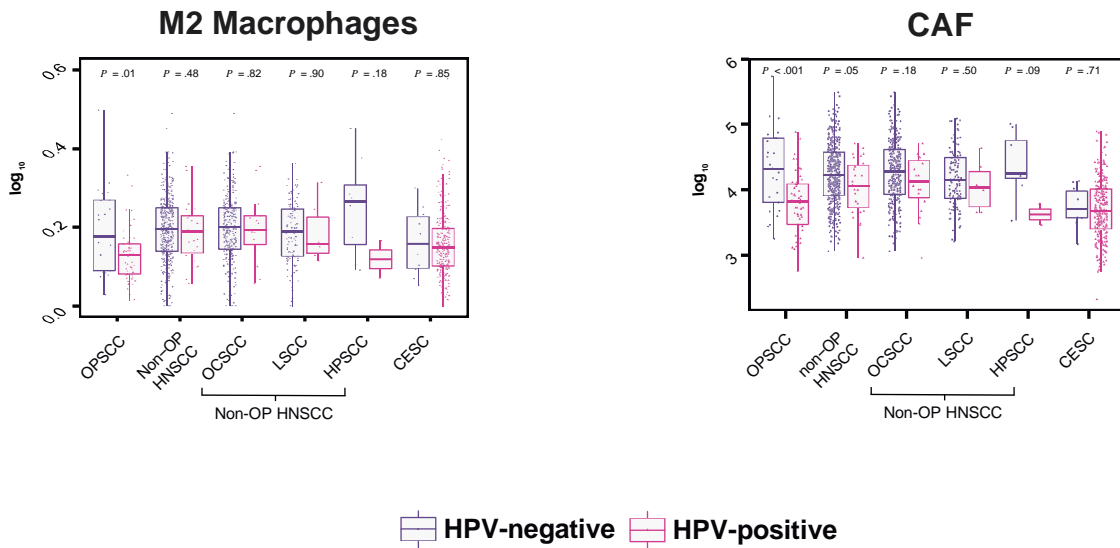

**eFigure 7.** Comparative analysis of immunogenomic metrics between HPV-positive and -negative patients within each tumor site. HPV-positive and -negative non-OP HNSCC and CESC are similar with regard to M2 macrophages, and CAF (cancer-associated fibroblasts); Significant differences are seen in the above parameters between HPV-positive and -negative OPSCC. OPSCC: oropharyngeal squamous cell carcinoma; non-OP HNSCC: non-oropharyngeal squamous cell carcinoma in the head and neck, which includes the oral cavity, larynx, and hypopharynx; OCSCC: oral cavity squamous cell carcinoma; LSCC: laryngeal squamous cell carcinoma; HPSCC: hypopharyngeal squamous cell carcinoma; CESC: cervical squamous cell carcinoma.

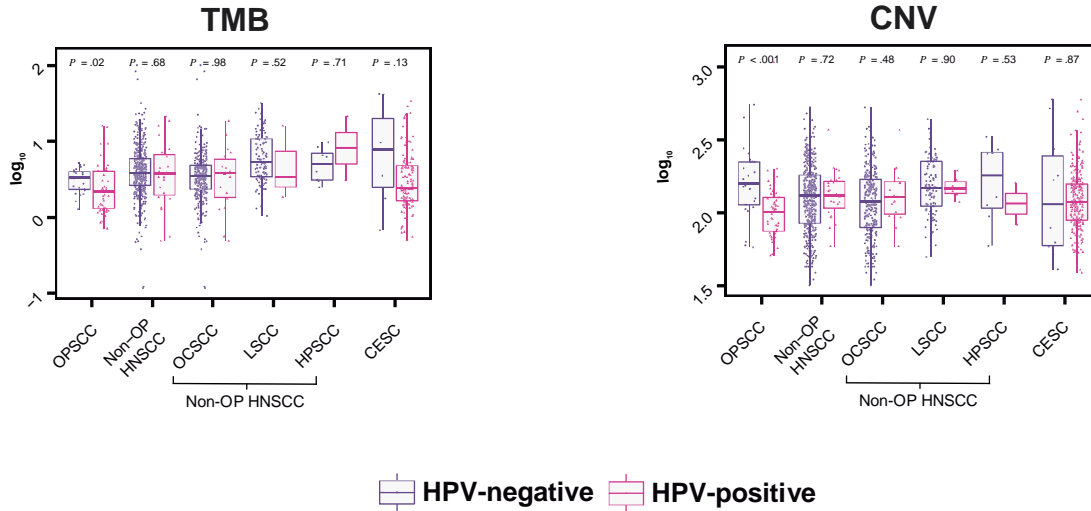

**eFigure 8.** Comparative analysis of immunogenomic metrics between HPV-positive and -negative patients within each tumor site. HPV-positive and -negative non-OP HNSCC and CESC are similar with regard to TMB (tumor mutation burden) and CNV burden, however, HPV-positive OPSCC has a significantly lower TMB and CNV burden than HPV-negative OPSCC. OPSCC: oropharyngeal squamous cell carcinoma; non-OP HNSCC: non-oropharyngeal squamous cell carcinoma in the head and neck, which includes the oral cavity, larynx, and hypopharynx; OCSCC: oral cavity squamous cell carcinoma; LSCC: laryngeal squamous cell carcinoma; HPSCC: hypopharyngeal squamous cell carcinoma; CESC: cervical squamous cell carcinoma.
